# Supplementary material
Source: Springer Nature journal article supplement (https://www.springermedizin.de/resource/supplementary/12957_2010_766_MOESM3_ESM.pdf/9565706)

GIST Overall Survival

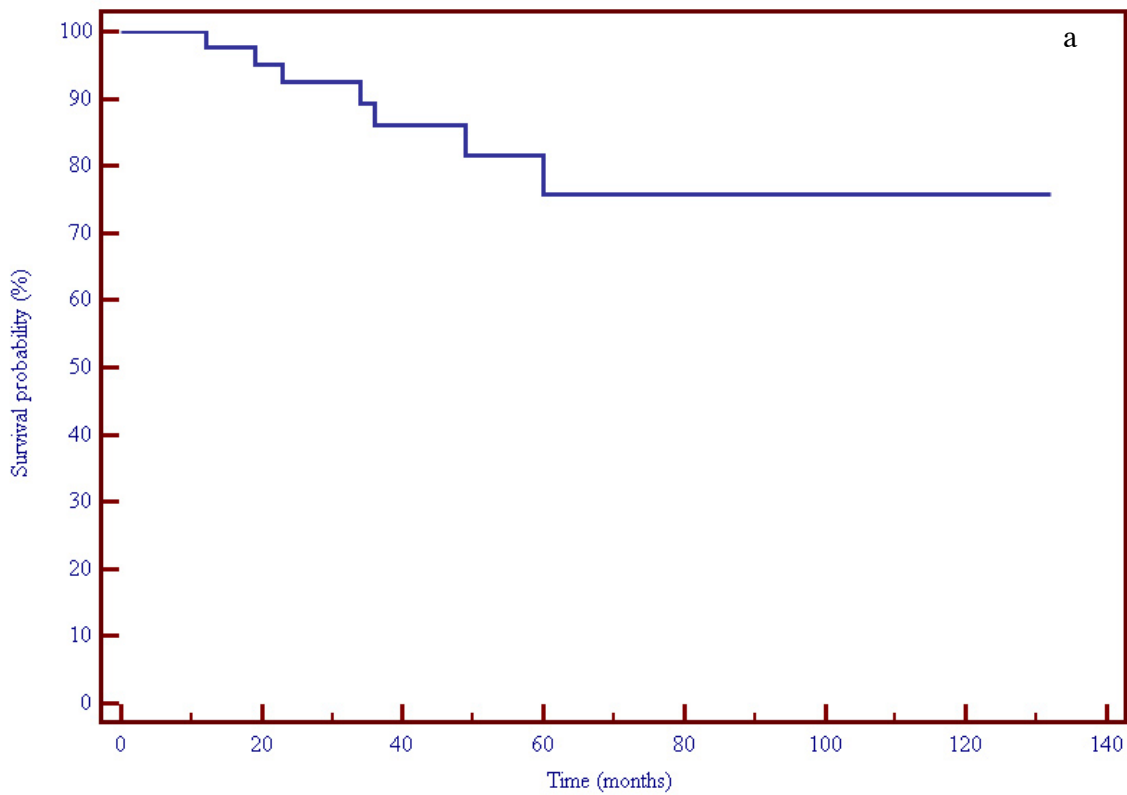

GIST OS and Symptoms

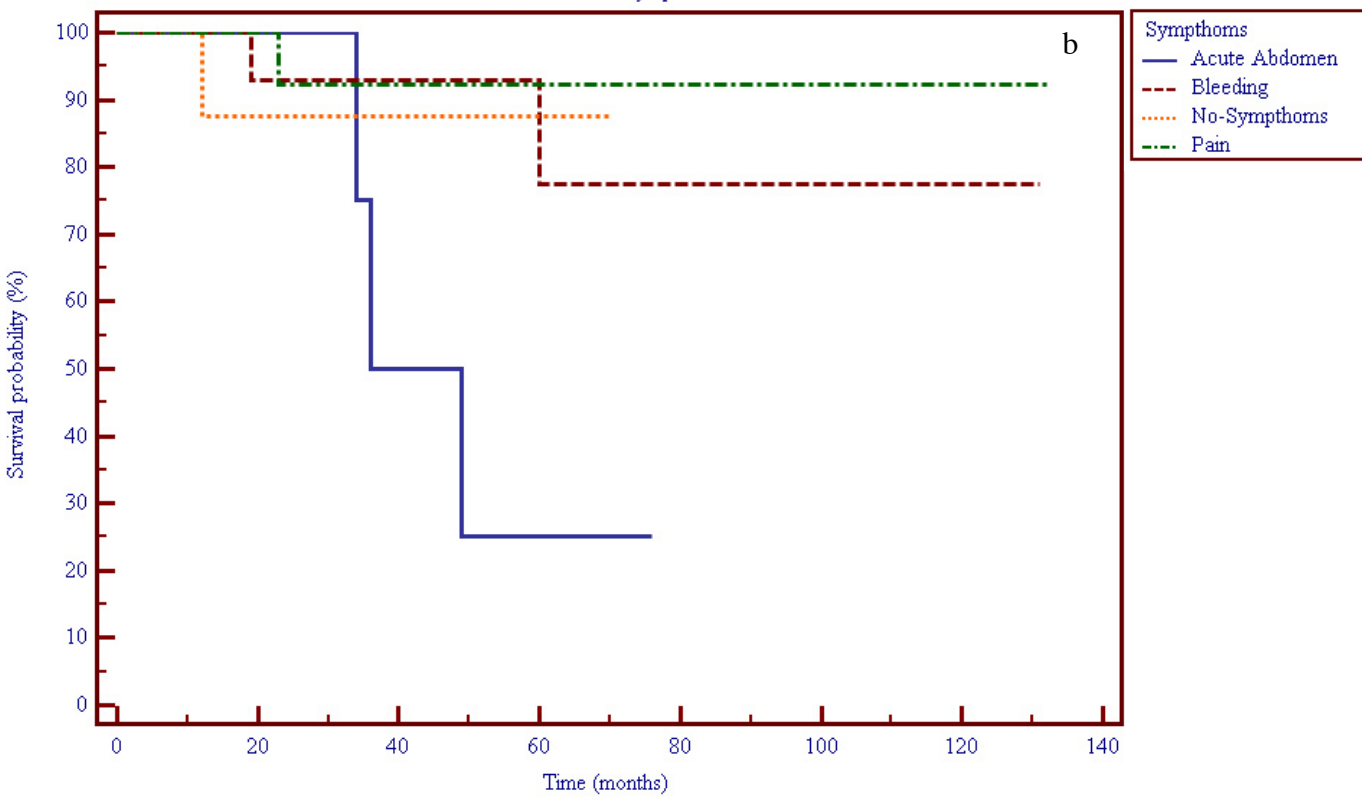

Supplement: MOESM3 [file 9565706]
